# Supplementary material for: Effects of some salts on H2O as probed by a thermodynamic signature of glycerol: towards understanding the Hofmeister effects (VII)
Source: Royal Society of Chemistry journal article supplement (doi:10.1039/c3cp53474j), 2013-10-26
Supplement: c3cp53474j.pdf [file c3cp53474j.pdf]

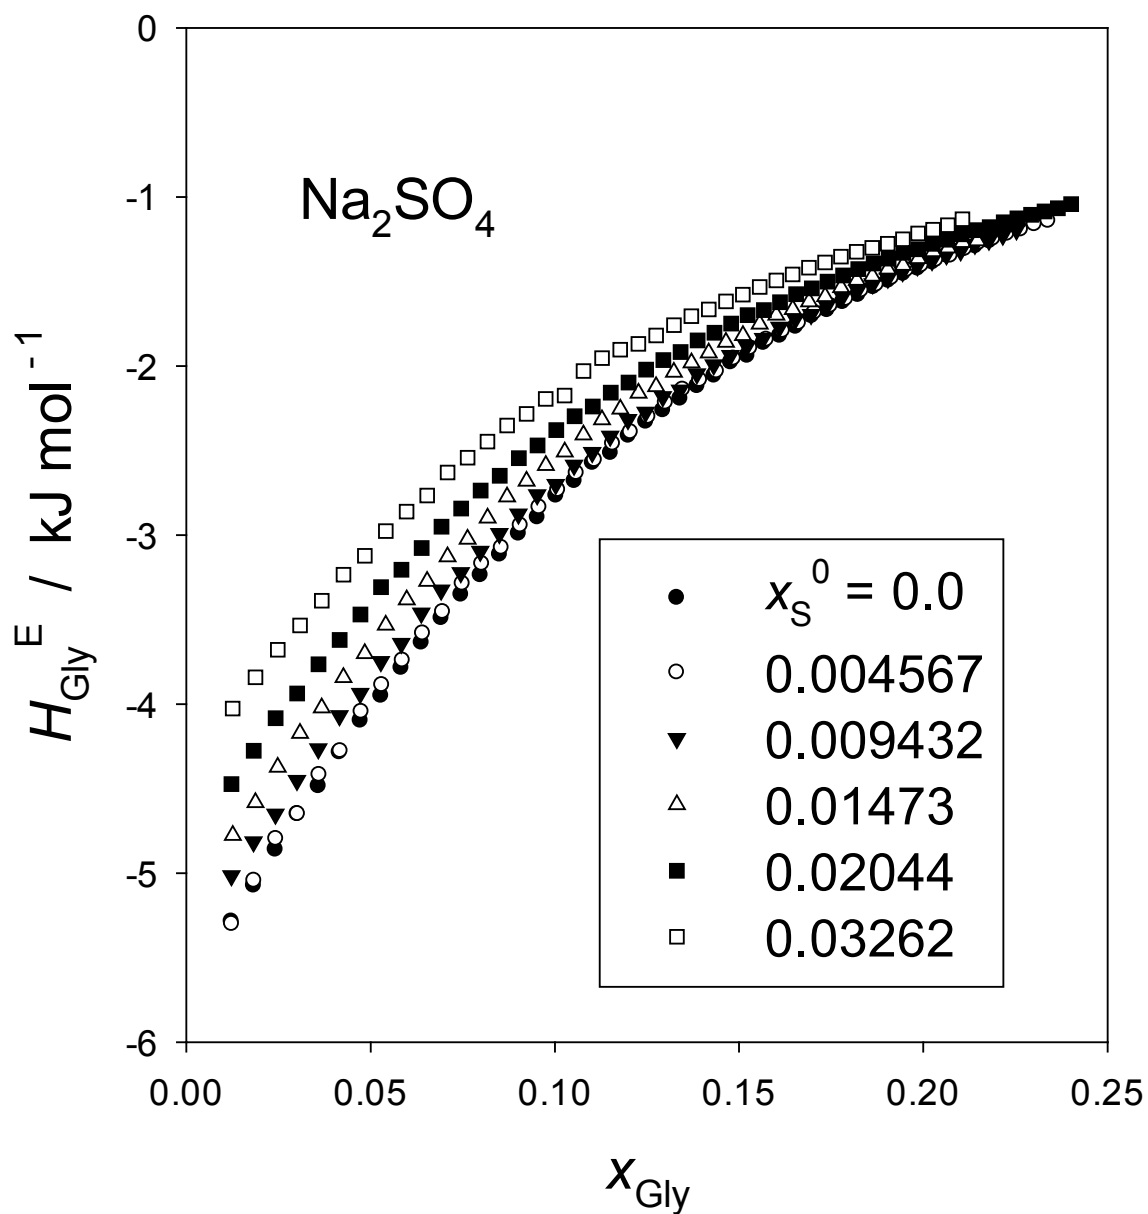

Fig S 3 (a)

Excess partial molar enthalpy of Gly,  $H_{\text{Gly}}^E$ , in Gly-Na<sub>2</sub>SO<sub>4</sub>-H<sub>2</sub>O at 25 °C. The raw data (See Table S2) were taken from the previous Gly-probing study.<sup>24</sup>

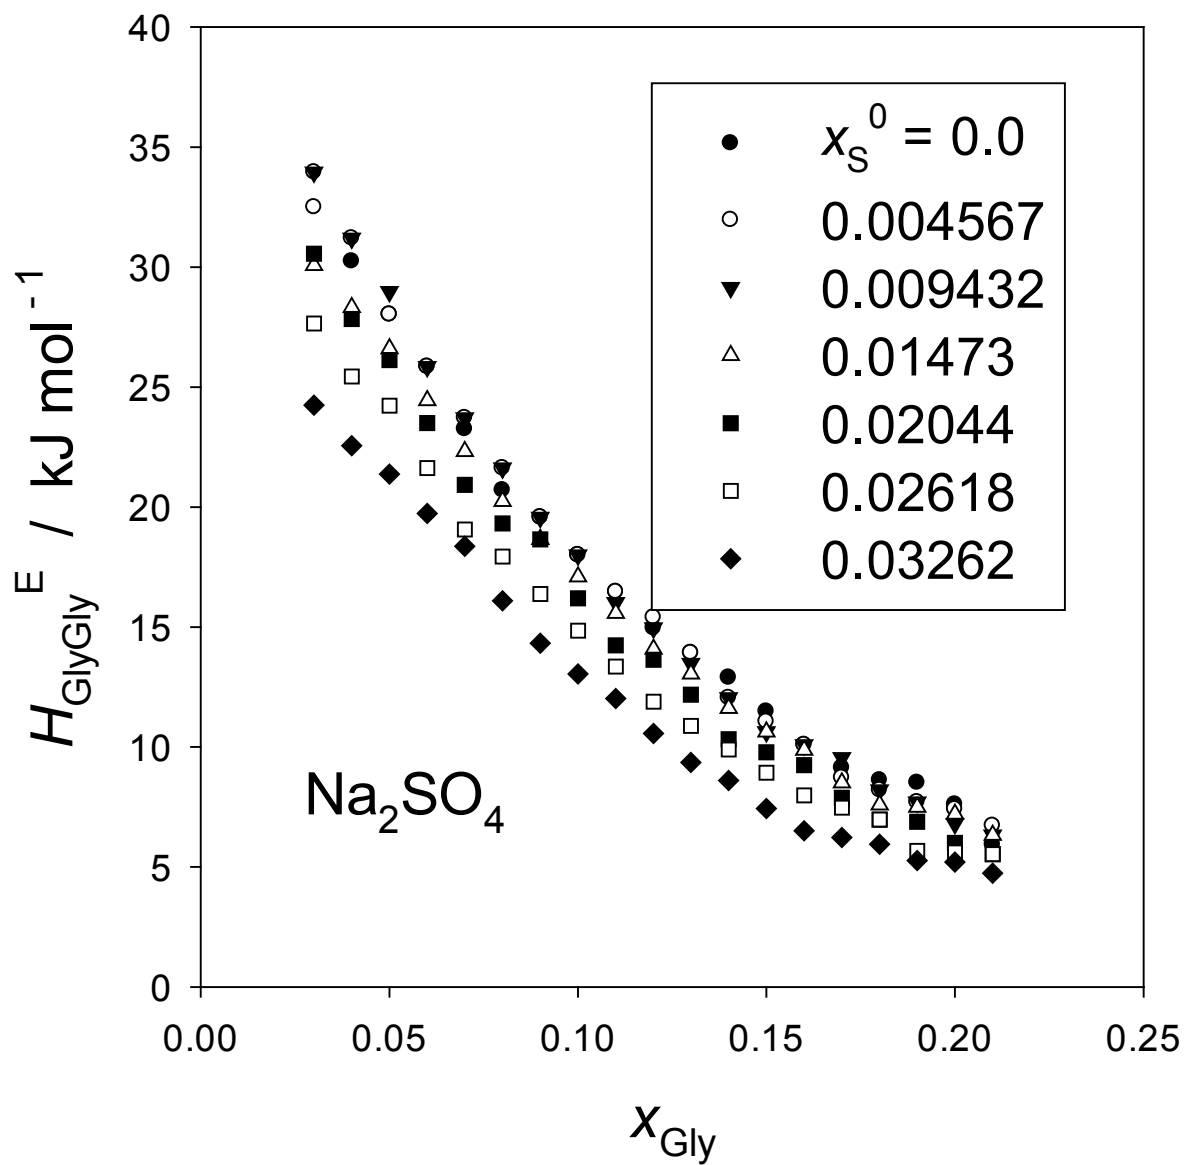

Fig. S3 (b)

The enthalpic Gly-Gly interaction in Gly- $\text{Na}_2\text{SO}_4$ - $\text{H}_2\text{O}$  at 25 °C.<sup>24</sup>
