# Supplementary material for: Effects of some salts on H2O as probed by a thermodynamic signature of glycerol: towards understanding the Hofmeister effects (VII)
Source: Royal Society of Chemistry journal article supplement (doi:10.1039/c3cp53474j), 2013-10-26
Supplement: c3cp53474j_2.pdf [file c3cp53474j_2.pdf]

**Table S4**

The values of calculated  $x_{\text{Gly}}(\text{X})$  at presumed point X from the data in the previous study,<sup>24</sup> and the values of  $H_{\text{GlyGly}}^{\text{E}}(\text{X})$  read off at  $x_{\text{Gly}}(\text{X})$ .

| Solute                          | $n_{\text{H}}$ | $x_{\text{S}}^0$ | $x_{\text{Gly}}(\text{X})$ | $H_{\text{GlyGly}}^{\text{E}}(\text{X})$ |
|---------------------------------|----------------|------------------|----------------------------|------------------------------------------|
| TBA                             |                | 0                | 0.08                       | 21.1                                     |
|                                 |                |                  | 0.01439                    | 22                                       |
|                                 | (tot) 29       | 0.02877          | 0.01095                    | 20                                       |
| 1P                              |                | 0                | 0.08                       | 21.1                                     |
|                                 |                |                  | 0.01652                    | 21                                       |
|                                 | (tot) 20       | 0.03314          | 0.02433                    | 20                                       |
| Urea                            |                | 0                | 0.08                       | 21.5                                     |
|                                 |                |                  | 0.03949                    | 21                                       |
|                                 | (tot) 0        | 0.06194          | 0.08                       | 20                                       |
| Na <sub>2</sub> SO <sub>4</sub> | + 5.2x2        | 0                | 0.08                       | 21.5                                     |
|                                 | - 14           | 0.01473          | 0.05007                    | 26                                       |
|                                 | (tot) 24.4     | 0.02618          | 0.02680                    | 29                                       |
|                                 |                | 0.03262          | 0.01372                    | 28                                       |
| NaCl                            | + 5.2          | 0                | 0.08                       | 21.3                                     |
|                                 | - 2.3          | 0.01964          | 0.06665                    | 23                                       |
|                                 | (tot) 7.5      | 0.03991          | 0.05286                    | 23                                       |
|                                 |                | 0.06496          | 0.03583                    | 24                                       |
| NaBr                            | + 5.2          | 0                | 0.08                       | 21.2                                     |

|       |       |     |         |         |      |
|-------|-------|-----|---------|---------|------|
|       | -     | 0   | 0.02301 | 0.06859 | 23   |
|       | (tot) | 5.2 | 0.05246 | 0.05398 | 22   |
|       |       |     | 0.06986 | 0.04535 | 20   |
|       |       |     | 0.08494 | 0.03787 | 18   |
| <hr/> |       |     |         |         |      |
| NaI   | +     | 5.2 | 0       | 0.08    | 22.0 |
|       | -     | 0   | 0.03382 | 0.06323 | 23   |
|       | (tot) | 5.2 | 0.04482 | 0.05777 | 22   |
|       |       |     | 0.06693 | 0.04680 | 19   |
|       |       |     | 0.08503 | 0.03783 | 16   |
| <hr/> |       |     |         |         |      |
| NaSCN | +     | 5.2 | 0       | 0.08    | 22.0 |
|       | -     | 0   | 0.02938 | 0.06543 | 23   |
|       | (tot) | 5.2 | 0.04673 | 0.05682 | 21   |
|       |       |     | 0.06641 | 0.04706 | 20   |
|       |       |     | 0.08705 | 0.03682 | 17   |
|       |       |     | 0.1111  | 0.02489 | 16   |

End of Table S4.
