# Supplementary material for: Effects of some salts on H2O as probed by a thermodynamic signature of glycerol: towards understanding the Hofmeister effects (VII)
Source: Royal Society of Chemistry journal article supplement (doi:10.1039/c3cp53474j), 2013-10-26
Supplement: c3cp53474j_2.xlsx [file c3cp53474j_2.xlsx]

## Sheet: Sheet1
HE(Gly) for Na2SO4
Data for ref (24)
Koga Analysis 13-05-15
HE(Gly)
Gly-Na2SO4
x(NS)0=	0.00456666	x(NS)0=	0.00943177	x(NS)0=	0.0147281	x(NS)0=	0.0204395	x(NS)0=	0.0261807	x(NS)0=	0.0326227
xGly	HE(Gly)	xGly	HE(Gly)	xGly	HE(Gly)	xGly	HE(Gly)	xGly	HE(Gly)	xGly	HE(Gly)
	kJ/mol		kJ/mol		kJ/mol		kJ/mol		kJ/mol		kJ/mol
0.0122337	-5.28762	0.0123051	-5.30196	0.0122241	-5.01606	0.0125492	-4.77642	0.0122408	-4.47325	0.0125467	-4.02577
0.0182391	-5.07317	0.0183447	-5.04476	0.0182247	-4.81592	0.0187064	-4.5834	0.0182494	-4.27631	0.0187026	-3.8409
0.0241718	-4.86176	0.024311	-4.79802	0.0241529	-4.65136	0.0247873	-4.37384	0.0241855	-4.08221	0.0247824	-3.6781
0.0300332	-4.65132	0.0302051	-4.65036	0.0300099	-4.45208	0.0307933	-4.17252	0.0300501	-3.93628	0.0307872	-3.53425
0.0358247	-4.48582	0.0360285	-4.41908	0.0357971	-4.26491	0.0367258	-4.02126	0.0358448	-3.76331	0.0367186	-3.38765
0.0415474	-4.28625	0.0417824	-4.27843	0.0415155	-4.06859	0.0425861	-3.84218	0.0415705	-3.6201	0.0425778	-3.23373
0.0472026	-4.09729	0.047468	-4.04525	0.0471666	-3.93586	0.0483755	-3.70044	0.0472287	-3.46936	0.0483661	-3.12183
0.0527914	-3.95077	0.0530865	-3.88689	0.0527514	-3.74765	0.0540953	-3.53206	0.0528205	-3.30782	0.0540849	-2.97604
0.0583151	-3.78595	0.0586391	-3.74132	0.0582711	-3.64119	0.0597468	-3.3825	0.058347	-3.20378	0.0597353	-2.86064
0.0637747	-3.63585	0.064127	-3.58105	0.0637269	-3.46164	0.0653311	-3.27259	0.0638094	-3.07546	0.0653187	-2.76539
0.0691713	-3.49165	0.0695512	-3.45469	0.0691198	-3.32462	0.0708495	-3.12761	0.0692087	-2.94937	0.0708361	-2.62998
0.0745062	-3.35301	0.074913	-3.2875	0.074451	-3.22241	0.0763032	-3.02405	0.0745462	-2.84191	0.0762888	-2.5426
0.0797802	-3.2362	0.0802133	-3.1703	0.0797214	-3.09587	0.0816931	-2.89875	0.0798228	-2.73596	0.0816779	-2.44637
0.0849944	-3.11443	0.0854532	-3.07498	0.0849322	-2.99055	0.0870206	-2.77337	0.0850395	-2.64851	0.0870044	-2.35152
0.0901499	-2.99089	0.0906337	-2.94255	0.0900842	-2.87574	0.0922866	-2.6801	0.0901975	-2.54484	0.0922695	-2.28257
0.0952476	-2.89584	0.0957559	-2.83553	0.0951786	-2.76109	0.0974922	-2.58755	0.0952976	-2.46847	0.0974742	-2.19387
0.100288	-2.76715	0.100821	-2.73312	0.100216	-2.70013	0.102638	-2.50767	0.100341	-2.37832	0.10262	-2.1747
0.105274	-2.67977	0.105829	-2.63302	0.105198	-2.58642	0.107726	-2.40723	0.105328	-2.29632	0.107707	-2.02934
0.110204	-2.57358	0.110782	-2.55578	0.110125	-2.51153	0.112757	-2.31727	0.110261	-2.2391	0.112736	-1.95339
0.11508	-2.51493	0.11568	-2.45869	0.114998	-2.41452	0.117731	-2.25455	0.115139	-2.15687	0.11771	-1.90307
0.119903	-2.41246	0.120525	-2.3902	0.119818	-2.31577	0.122649	-2.15954	0.119964	-2.09691	0.122628	-1.86915
0.124673	-2.3278	0.125317	-2.29915	0.124586	-2.27333	0.127514	-2.12162	0.124737	-2.02	0.127491	-1.81936
0.129392	-2.26203	0.130057	-2.21682	0.129302	-2.18099	0.132324	-2.0357	0.129458	-1.96386	0.132301	-1.75825
0.134061	-2.19227	0.134746	-2.13903	0.133968	-2.14224	0.137082	-1.98101	0.134128	-1.91643	0.137058	-1.70492
0.13868	-2.11804	0.139384	-2.08272	0.138584	-2.04624	0.141787	-1.9222	0.138749	-1.84804	0.141763	-1.66492
0.14325	-2.05582	0.143973	-2.03176	0.143151	-1.99272	0.146442	-1.85932	0.143321	-1.80266	0.146417	-1.61695
0.147771	-1.97802	0.148514	-1.95569	0.14767	-1.93753	0.151047	-1.81947	0.147844	-1.7485	0.151021	-1.57741
0.152245	-1.93953	0.153006	-1.89321	0.152142	-1.88312	0.155602	-1.75163	0.15232	-1.69872	0.155575	-1.53219
0.156672	-1.86303	0.157452	-1.84278	0.156567	-1.83647	0.160108	-1.69853	0.156749	-1.66803	0.160081	-1.49339
0.161054	-1.82087	0.161851	-1.79187	0.160946	-1.76987	0.164567	-1.66533	0.161132	-1.62134	0.164539	-1.45784
0.16539	-1.76742	0.166204	-1.74532	0.165279	-1.72187	0.168979	-1.62006	0.16547	-1.57413	0.16895	-1.41793
0.169681	-1.70484	0.170512	-1.68362	0.169569	-1.69471	0.173344	-1.58827	0.169763	-1.53981	0.173315	-1.38734
0.173929	-1.66949	0.174776	-1.64447	0.173814	-1.64387	0.177664	-1.53521	0.174012	-1.49966	0.177634	-1.3527
0.178133	-1.6218	0.178996	-1.60188	0.178016	-1.58897	0.181938	-1.49188	0.178218	-1.46389	0.181908	-1.32389
0.182295	-1.57928	0.183174	-1.55298	0.182176	-1.55286	0.186169	-1.46828	0.182381	-1.42526	0.186138	-1.3004
0.186415	-1.53227	0.187309	-1.5191	0.186293	-1.51316	0.190356	-1.42615	0.186503	-1.39248	0.190324	-1.27649
0.190493	-1.49505	0.191402	-1.47878	0.19037	-1.48008	0.1945	-1.40385	0.190583	-1.36326	0.194468	-1.24958
0.194531	-1.45492	0.195455	-1.43236	0.194406	-1.44112	0.198602	-1.36328	0.194622	-1.32894	0.198569	-1.21492
0.198529	-1.42309	0.199467	-1.40518	0.198401	-1.40702	0.202662	-1.32237	0.198621	-1.30828	0.202629	-1.19341
0.202487	-1.38672	0.203439	-1.37266	0.202358	-1.37561	0.206681	-1.30038	0.202581	-1.2761	0.206648	-1.16621
0.206406	-1.34559	0.207372	-1.34582	0.206275	-1.3417	0.21066	-1.26867	0.206501	-1.25206	0.210627	-1.13126
0.210287	-1.31417	0.211266	-1.30722	0.210154	-1.31893	0.2146	-1.25846	0.210384	-1.21977
0.21413	-1.2914	0.215122	-1.26975	0.213996	-1.28015			0.214228	-1.19587
0.217936	-1.2621	0.218941	-1.24513	0.2178	-1.25521			0.218035	-1.17804
		0.222723	-1.21707	0.221568	-1.22527			0.221806	-1.14902
		0.226468	-1.19269	0.225299	-1.19473			0.22554	-1.12569
		0.230178	-1.16132					0.229239	-1.10435
		0.233851	-1.14152					0.232902	-1.08498
								0.236531	-1.06638
								0.240126	-1.04127
